# Supplementary figures and images for: Saharan dust episodes in Italy: influence on PM10 daily limit value (DLV) exceedances and the related synoptic
Source: Royal Society of Chemistry journal article supplement (doi:10.1039/b903822a), 2009-01-01

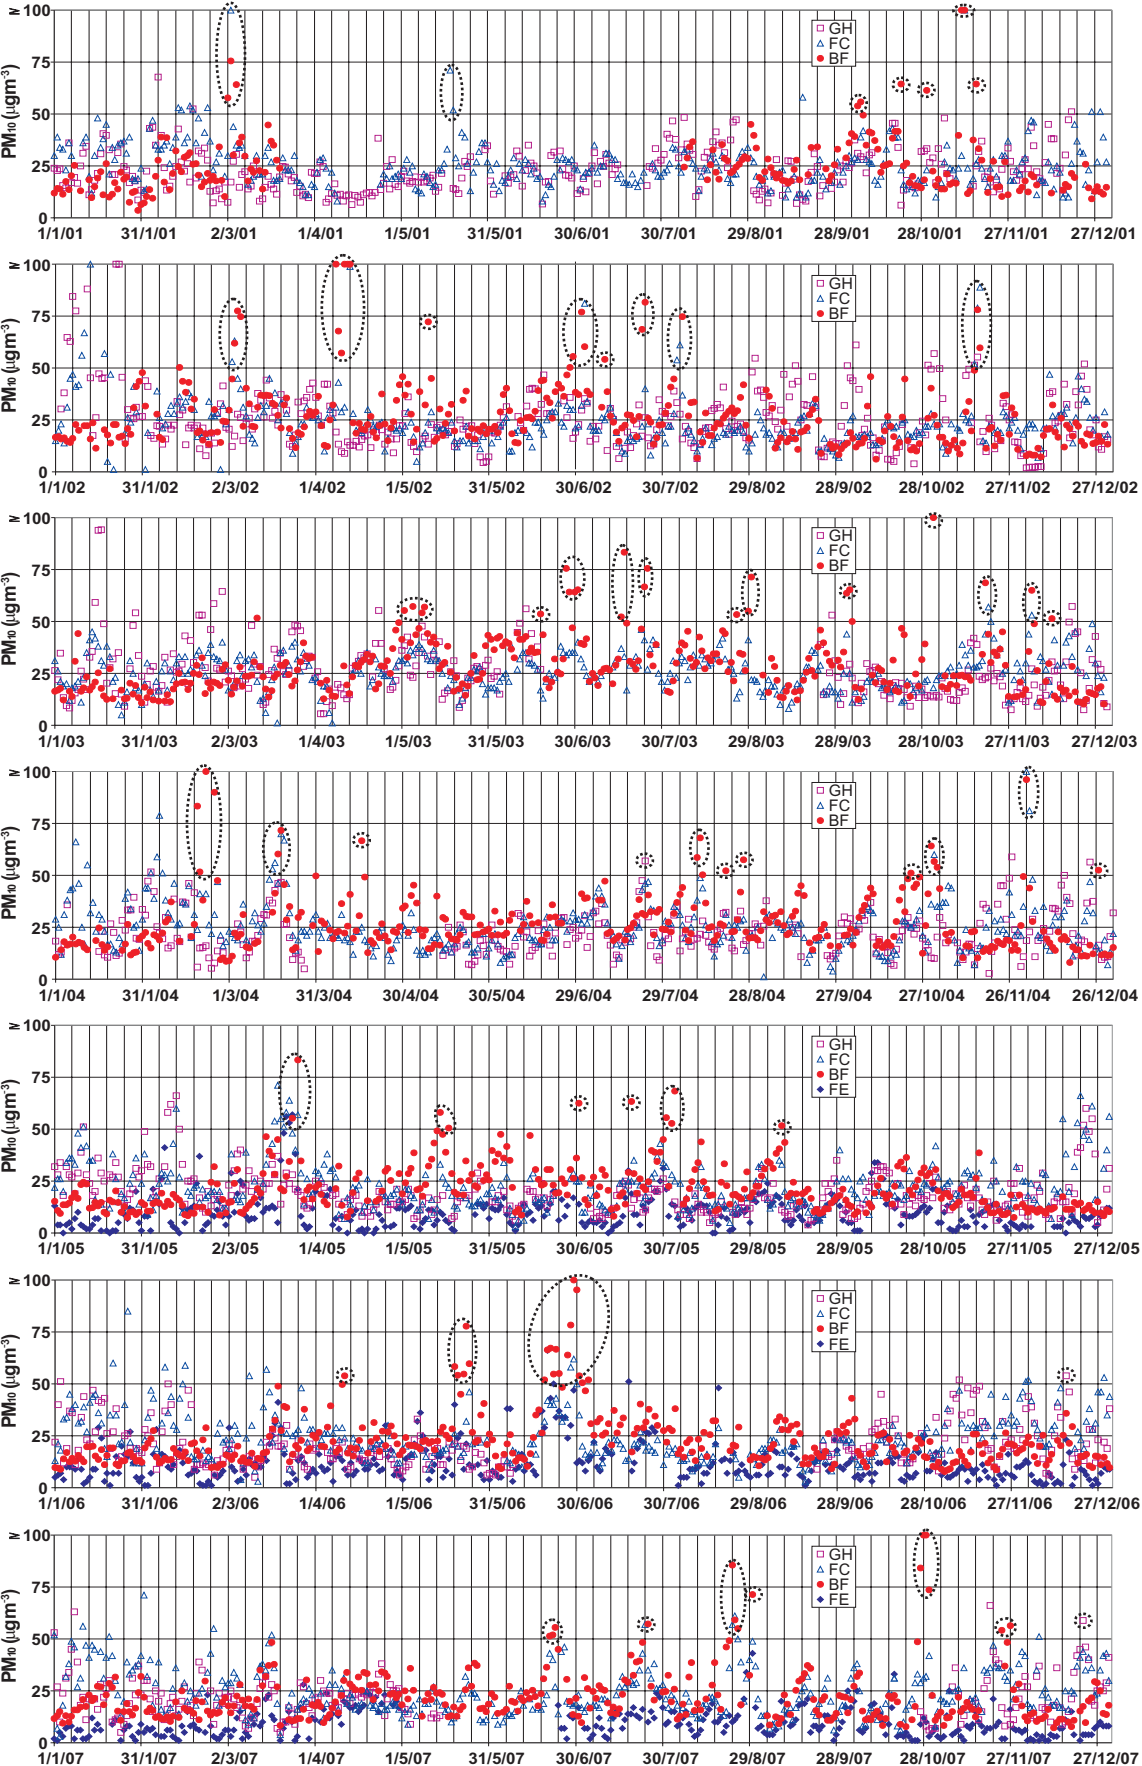

Supplement: figure_s5.pdf [file figure_s5.pdf]
